# Supplementary material for: The Clostridium difficile Cell Wall Protein CwpV is Antigenically Variable between Strains, but Exhibits Conserved Aggregation-Promoting Function
Source: PubMed Central journal article supplement (PMC3080850; doi:10.1371/journal.ppat.1002024), 2011-04-21
Supplement: ppat.1002024.s001.pdf [file ppat.1002024.s001.pdf]

A

630 : Type I

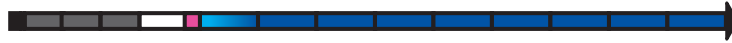

```

rpt6 GQLTFDATDKQIKMASGDKTVDPSSDDTYVLTTLTKGTAKDGDVKANVEVTGLPSGLDYTAE 60
rpt7 GQLTFDATDKQIKMASGDKTVDPSSDDTYVLTTLTKGTAKDGDVKANVEVTGLPSGLDYTAE 60
rpt5 GQLTFDATDKQIKMASGDKTVDPSSDDTYVLTTLTKGTAKDGDVKANVEVTGLPSGLDYTAE 60
rpt4 GQLTFDATDKQIKMASGDKTVDPSSDDTYVLTTLTKGTAKDGDVKANVEVTGLPSGLDYTAE 60
rpt2 GQLTFDATDKQIKMASGDKTVDPSSDDTYVLTTLTKGTAKDGDVKANVEVTGLPSGLDYTAE 60
rpt3 GQLTFDATDKQIKMASGDKTVDPSSDDTYVLTTLTKGTAKDGD IKANVEVTGLPSGLDYTAE 60
rpt9 GQLTFDATDKQIKMASGDKTVDPSSDDTYVLTTLTKGTAKDGDVKANVEVIGLPSGLDYTAE 60
rpt8 GQLTFDATDKQIKMASGDKTVDPSSDDTYVLTTLTKGTAKDGDVKANVEVIGLPSGLDYTAE 60
rpt1 GQIKFSATDKQIKMASGDKTVDPSDNTYILKLTNGTVKGDVKANVKVAGLPSGLDYTAV 60
**:. * .*****:*. * .**:* * .***:****:* *****

```

```

rpt6 GDSSANTITITVSGTASQAVQTDLDNVSVLVKAGAVSETTATDSAANATFEVKKYVAPAI 120
rpt7 GDSSANTITITVSGTASQAVQTDLDNVSVLVKAGAVSETTATDSAANATFEVKKYVAPAI 120
rpt5 GDSSANTITITVSGTASQAVQTDLDNVSVLVKAGAVSETTATDSAANATFEVKKYVAPAI 120
rpt4 GDSSANTITITVSGTASQAVQTDLDNVSVLVKAGAVSETTATDSAANATFEVKKYVAPAI 120
rpt2 GDSSTNTITITVSR TASQAVQTDLDNVSVLVKAGAVSETTATDSAANATFEVKKYVAAPA 120
rpt3 GDSSANTITITVSGTASQAVQTDLDNVSVLVKAGAVSETTATDSAANATFEVKKYVAAPA 120
rpt9 GDSSANTITITVSGTASQAVQTDLDNISVLVKAGAVSETTATDSAANATFEVKKHASDPI 120
rpt8 GDSSANTITITVSGTASQAVQTDLDNVSVLVKAGAVSETTATDSAANATFEVKKYVAPAI 120
rpt1 GNRSANTITITVSGTASQSIQNDLNNVSVLVKAGAVSGTGATDSIANTTFEIKKYVAPAI 120
*: * :***** ***: :*. **:* :***** * **** **:* **:* :. .

```

B

R20352 : Type II

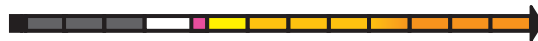

```

rpt2 AVDKTALQDAVTAATALHAKATEGTAEGNYAVGSKATYKTAIDEAQAILDKSDATQKEVN 60
rpt3 AVDKTALQDAVTAATALHNGATEGTAEGNYAVGSKATYKTAIDEAQAILDKSDATQKEVN 60
rpt4 AVDKTALQDAVTAATALHNGATEGTAEGEYAVGSKATYKTAIDEAQAILDKSDATQKEVN 60
rpt6 -LNKTALQDAVTAATSLHAGATEGTAEGNYAVGSKATYKTAIDEAQAILDKTGATQKEID 59
rpt7 -LNKTALQDAVTAATSLHAGATEGTAEGNYAVGSKATYKTAIDEAQAILDKTGATQKEID 59
rpt8 -LNKTALQDAVTAATSLHAGATEGTAEGNYAVGSKATYKTAIDEAQAILDKADATQKEID 59
rpt5 AVDKTALQDAVTAATALHNGATEGTAEGNYAVGSKATYKTAIDEAQAILDKTGATQKEID 60
rpt1 KVDKVVLKNTIT AANKLYNEAIEGTNVGEYKVGSKAIYKTAIDKAQAILDKSGVTQKEVN 60
:*. * .*: :.***. *: * *** *:* ***** *****:*****:.. *****:

```

```

rpt2 DALSALNTATETFEAGKV----- 79
rpt3 DALSALNTATETFEAGKV----- 79
rpt4 DALTALNTATETFEAGKV----- 79
rpt6 DALSALNTATDTFKAGKV----- 78
rpt7 DALSALNTATDTFKAGKV----- 78
rpt8 DAVTALNTATATFEAGKVP T TIALMLSRILGFMKLEA 96
rpt5 DALSALNTATDTFKAGKV----- 79
rpt1 DAVTALNTATDTFKAGKV----- 79
**.:***** **:* **

```

C

CDKK167 : Type III

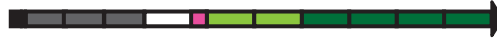

```
rpt4 RTAIDTEQLAVQAEADKITSVTQPTQDATTLLTMP TVASGYTIKIKSSTNESVIAKDGTIV 60
rpt6 RTAIDTEQLAVQAEADKITSVTQPTQDATTLLTMP TVASGYTIKIKSSTNESVIAKDGTIV 60
rpt5 RTAIDTEQLAVQAEADKITSVTQPTQDATTLLTMP TVASGYTIKIKSSTNESVIAKDGTIV 60
rpt3 KSTDGEIQAEVQAEADKITSVTQPTQDATTLLTMP TVASGYTIKIKSSTNESVIAKDGTIV 60
rpt1 -----NQTSVNNEAAKITSVPTPAKDATRLTMP SVSSGYTIAIKTSSNESVIKKGDTII 54
rpt2 KSTDEELQAALDNEVAKITSVPAPAKDATKLTMP SVSSGYTIAIKTSSNKSVIKEDGTII 60
      *  :. *. *****. *.:*** *****:*.***** **:*.*:*** :****:

rpt4 PPDTETKVTLVFTVTHTS SGGKIADTGEIEVTVPA----- 94
rpt6 PPDTETKVTLVFTVTHTS SGGKTADTGEIEVTVPARTTVSLLGRIAVNIFNFKLEA 118
rpt5 PPDTETKVTLVFTVTHTS SGGKTADTGEIEVTVPA----- 94
rpt3 PPDTETKVTLVFTVTHTS SGGKTADTGEIEVTVPA----- 94
rpt1 PPNTATTVKLVFTVTHTS SGGKTADTKELSVTVPA----- 88
rpt2 PPNTEETVTLVFTVTHTS SGGKTADTGEIDVVVPA----- 94
      **:*. *.*****: ***** ** *:.*.***
```
